# Supplementary material for: Specific prostaglandins are produced in the migratory cells and the surrounding substrate to promote Drosophila border cell migration
Source: Front Cell Dev Biol. 2024 Jan 12;11:1257751. doi: 10.3389/fcell.2023.1257751 (PMC10811798; doi:10.3389/fcell.2023.1257751)
Supplement: Supplementary file 4 [file Table1.XLSX]

## Sheet: Sheet1
Key Resources Table
Reagent type (species) or resources	Designation	Source or reference	Identifiers	Additional information
Genetic reagent (Drosophila melanogaster)	y1w1	Bloomington Drosophila Stock Center	RRID: 1495	genotype: y1w1
Genetic reagent (Drosophila melanogaster)	c355 GAL4	Bloomington Drosophila Stock Center	RRID: 3750	genotype: P{w[+mW.hs]=GawB}c355.w[1118]
Genetic reagent (Drosophila melanogaster)	mgst1KG04713	Bloomington Drosophila Stock Center	RRID: 13839	genotype: P{SUPor-P}Mgst1KG04713
Genetic reagent (Drosophila melanogaster)	mgst1d10243	Harvard Exelixis Collection	RRID: d10243	genotype: P{XP}Mgstld10243
Genetic reagent (Drosophila melanogaster)	Su(P)EY13245	Bloomington Drosophila Stock Center	RRID: 20866	genotype: y[1]w[67c23]; P{y[+mDint2]w[+mC]=EPgy2}Su(P){EY13245}
Genetic reagent (Drosophila melanogaster)	p23EY05607	Bloomington Drosophila Stock Center	RRID: 16661	genotype: y{1}W[67c23]; P{y[mDint2]w[+mC]=EPgy2}p23[EY05607]
Genetic reagent (Drosophila melanogaster)	akr1BPL00034	Bloomington Drosophila Stock Center	RRID:19594	genotype: w[*]; PBac{GAL4D,EYFP}Akr1B[PL00034] P{w[+mW.hs]=FRT(w[hs])}2A P{ry[+t7.2]=neoFRT}82B
Genetic reagent (Drosophila melanogaster)	akr1BEY07011	Bloomington Drosophila Stock Center	RRID:16777	genotype: y[1] w[67c23]; P{y[+mDint2] w[+mC]=EPgy2}Akr1B[EY07011]
Genetic reagent (Drosophila melanogaster)	akr1Bd00405	Harvard Exelixis Collection	RRID: d00405	genotype: P{XP}Akr1Bd00405
Genetic reagent (Drosophila melanogaster)	p23 RNAi	Bloomington Drosophila Stock Center	RRID: 62911	genotype: y[1] v[1]; P{y[+t7.7] v[+t1.8]=TRiP.HMJ24151}attP40
Genetic reagent (Drosophila melanogaster)	p23 RNAi-2	Bloomington Drosophila Stock Center	RRID: 41862	genotype: y[1] sc[*] v[1] sev[21]; P{y[+t7.7] v[+t1.8]=TRiP.GL01292}attP2/TM3, Sb[1]
Genetic reagent (Drosophila melanogaster)	akr1B RNAi	Bloomington Drosophila Stock Center	RRID: 67838	genotype: y[1] sc[*] v[1] sev[21]; P{y[+t7.7] v[+t1.8]=TRiP.HMS05657}attP40
Genetic reagent (Drosophila melanogaster)	UAS-Dicer 2	Bloomington Drosophila Stock Center	RRID: 24651	genotype: w[1118]; P{w[+mC]=UAS-Dcr-2.d}10
Genetic reagent (Drosophila melanogaster)	pxtf01000	Harvard Exelixis Collection (Thibault et al., 2004)		genotype: Pbac{WH}Pxtf01000
Genetic reagent (Drosophila melanogaster)	oskar GAL4	Telley et al., 2012	RRID: 44241	genotype: w[1118]; P{w[+mC]=osk-GAL4::VP16}A11/CyO
Genetic reagent (Drosophila melanogaster)	Df(3L)ED4475	Bloomington Drosophila Stock Center	RRID: 8069	genotype: w1118; Df(3L)ED4475, P{3'.RS5+3.3'}ED4475/TM6C, cu1 Sb1
Genetic reagent (Drosophila melanogaster)	Df(3L)BSC577	Bloomington Drosophila Stock Center	RRID: 25411	genotype: w[1118]; Df(3L)BSC577/TM6C, cu[1] Sb[1]
Genetic reagent (Drosophila melanogaster)	actin-5c GAL4	Bloomington Drosophila Stock Center	RRID: 8807	genotype: w[*]; P{w[+mC]=GAL4-btl.S}2, P{w[+mC]=UASp-Act5C.T:GFP}2/CyO, P{w[+m*]=lacZ.w[+]}276
antibody	mouse anti-Fascin	Developmental Studies Hybridoma Bank, Cant et al., 1994	sn7c; AB_528239	Dilution 1 to 50
antibody	mouse anti-βPS-Integrin	Developmental Studies Hybridoma Bank, Brower et al., 1984	CF.6G11; AB_528310	Dilution 1:10
antibody	mouse anti-EYA	Developmental Studies Hybridoma Bank, Boyle et al., 1997	eya 10H6; AB_528232	Dilution 1:100
antibody	rabbit polyclonal anti-Phospho-Myosin Light Chain 2 (Ser19)	Cell Signaling	Cat# 3671; AB_330248	Dilution 1:100
antibody	mouse monoclonal anti Hu li tai shao (Hts)	Developmental Studies Hybridoma Bank, Zaccai and Lipshitz, 1996	1B1; AB_528070	Dilution 1:50
antibody	mouse monoclonal anti -Fasciclin III	Developmental Studies Hybridoma Bank, Patel et al., 1987	FasIII; AB_528238	Dilution 1:50
antibody	rabbit polyclonal anti-p23	Genscript		Dilution 1:1000 (IF), 1:50,000 (WB)
antibody	rabbit polyclonal anti-Akr1B-2	Genscript		Dilution 1:1000 (IF),1:100,000 (WB)
antibody	goat polyclonal Alexa Fluor 488 anti-mouse	Thermo Fischer (Invitrogen)	A-11001 AB_2534069	Dilution 1:500
antibody	goat polyclonal Alexa Fluor 568 anti-mouse	Thermo Fischer (Invitrogen)	A-11004 AB_2534072	Dilution 1:500
antibody	goat polyclonal Alexa Fluor 488 anti-rabbit	Thermo Fischer (Invitrogen)	A-11034 AB_2576217	Dilution 1:500
antibody	goat polyclonal Alexa Fluor 568 anti-rabbit	Thermo Fischer (Invitrogen)	A-11055 AB_2534102	Dilution 1:500
antibody	mouse anti-a-Tubulin	Sigma-Aldrich	Cat: T9026 AB_477593	Dilution 1:5000
antibody	Peroxidase-AffiniPure goat polyclonal anti-rabbit	Thermo Fischer (Invitrogen)	111-035-003 AB_2313567	Dilution 1:5000
antibody	Peroxidase-AffiniPure goat polyclonal anti-mouse	Thermo Fischer (Invitrogen)		Dilution 1:5000
Chemical compound, drug	4',6-Diamidino-2-phenylindole (DAPI)	Thermo Fischer (Invitrogen)	D3571 lot 699931	Dilution 1:5000
Chemical compound, drug	Alexa Flour 568 or 647 Phalloidin	Thermo Fischer (Invitrogen)	A12380 or A22287	Dilution 1:250
Chemical compound, drug	Y-27632	Millipore Sigma	Y0503	200μM
Chemical compound, drug	Precision Plus Protein All Blue Standards	Bio Rad Laboratories	Cat: 161-0373	10μl
Chemical compound, drug	Precision Plus Protein Dual Color Standards	Bio Rad Laboratories	Cat: 161-0374	10μl
Chemical compound, drug	SuperSignal™ West Pico PLUS Chemiluminescent Substrate	Thermo Fischer (Invitrogen)	Cat: 34577, SCR_008452
Chemical compound, drug	SuperSignal™ West Femto Maximum Sensitivity Substrate	Thermo Fischer (Invitrogen)	Cat: 34095, SCR_008452
Software, algorithm	Fiji- Image J	PMID 22743772	SCR_001905
Software, algorithm	Excel	Micosoft	SCR_016137
Software, algorithm	Zen Digital Imaging for Light Microscopy	Carl Zeiss	SCR_013672
Software, algorithm	GraphPad Prism	GraphPad	SCR_002798
Software, algorithm	LAS AS SPE Core	Leica
Software, algorithm	Amersham Imager 600 series Scanning Chemiluminescence	Amersham
Software, algorithm	NIS-Elements Software	Nikon	SCR_014329
Software, algorithm	LAS-X	Leica	SCR_013673
Software, algorithm	Adobe Photoshop	Adobe	SCR_014199
Software, algorithm	Adobe Illustrator	Adobe	SCR_010279
other	Schneider's Drosophila Medium	Sigma-Aldrich	MFcd00242089
other	Grace's insect medium	Lonza	Cat: 04-457F
